# Supplementary material for: Adaptability of Wild-Growing Tulips of Greece: Uncovering Relationships between Soil Properties, Rhizosphere Fungal Morphotypes and Nutrient Content Profiles
Source: MDPI journal article supplement (doi:10.3390/biology12040605), 2023-04-16
Supplement: s1 [file s1]

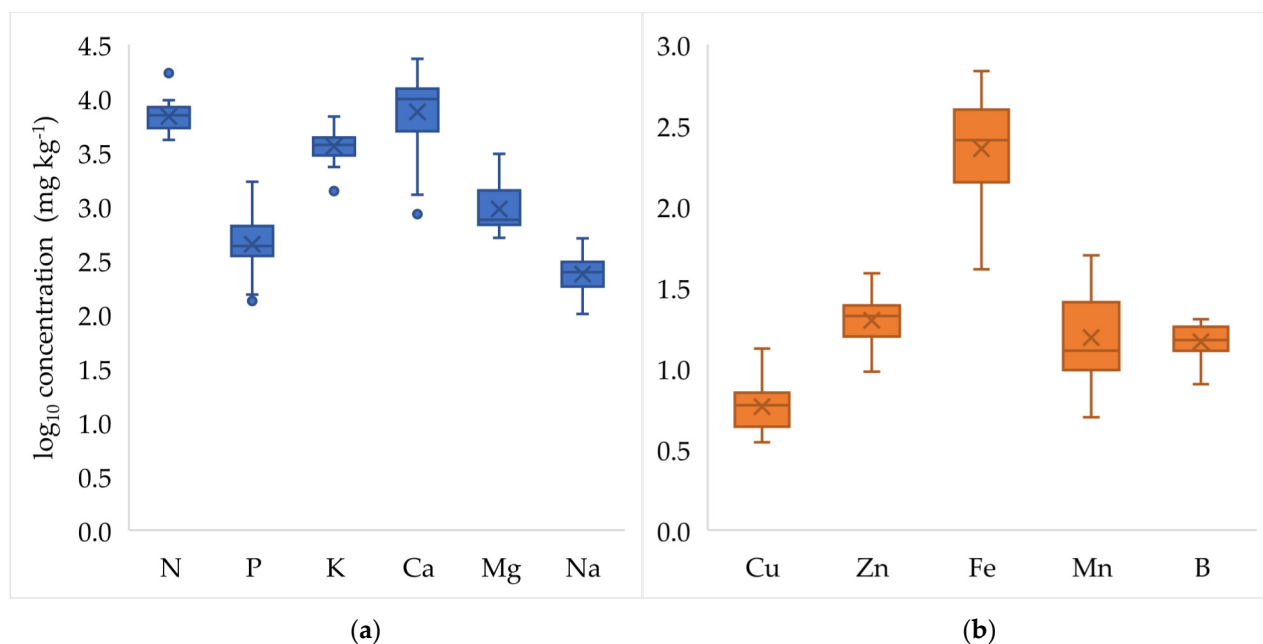

**Figure S1.** Boxplots showing  $\log_{10}$  concentrations of (a) macro-nutrients (N, P, K, Ca, Mg) and beneficial element Na, and (b) micro-nutrients (Cu, Zn, Fe, Mn, and B) in subterranean bulbs biomass of the studied wild-growing Greek tulip species.
